# Supplementary material for: Supramolecular Thixotropic Ionogel Electrolyte for Sodium Batteries
Source: MDPI journal article supplement (doi:10.3390/gels8030193), 2022-03-20
Supplement: s1 [file s1]

Supplementary Materials

# Supramolecular Thixotropic Ionogel Electrolyte for Sodium Batteries

Shipeng Chen <sup>1,\*</sup>, Li Feng <sup>2</sup>, Xiaoji Wang <sup>3,4</sup>, Yange Fan <sup>1</sup>, Yubin Ke <sup>3</sup>, Lin Hua <sup>1</sup>, Zheng Li <sup>1</sup>, Yimin Hou <sup>1,\*</sup> and Baoyu Xue <sup>1,\*</sup>

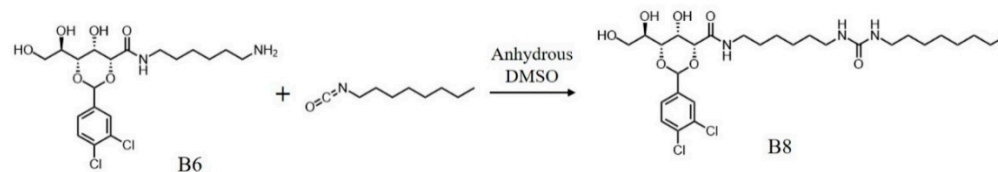

Figure S1. Synthetic route of B8.

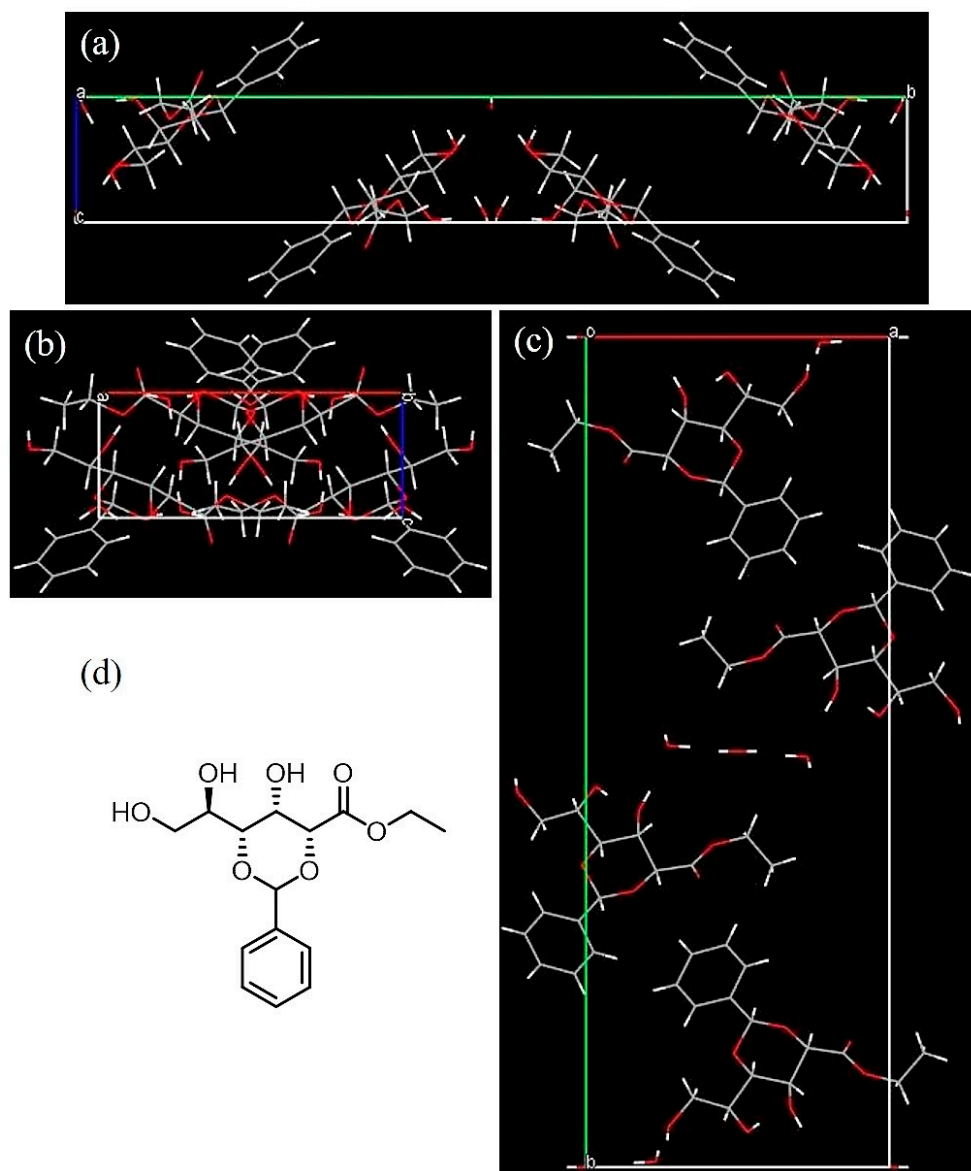

**Figure S2.** Unit cell of the co-crystal of Z1 and H<sub>2</sub>O along the (a) a-axis, (b) b-axis, (c) c-axis. Color code: C = gray; H = white; O = red. (d) The chemical formula of Z1.

**Table S1.** Crystallographic details of the co-crystal of Z1 and H<sub>2</sub>O.

|                                                          |                                                |
|----------------------------------------------------------|------------------------------------------------|
| <b>CCDC No.</b>                                          | 1960998                                        |
| <b>Formula</b>                                           | C <sub>15</sub> H <sub>20</sub> O <sub>7</sub> |
| <b>Formula weight</b>                                    | 692.69                                         |
| <b>Crystal system</b>                                    | Orthorhombic                                   |
| <b>Space group</b>                                       | P 21 21 2                                      |
| <b>T, K</b>                                              | 293                                            |
| <b><math>\lambda</math> (Cu K<math>\alpha</math>), Å</b> | 1.54184                                        |
| <b>a, Å</b>                                              | 11.3217(3)                                     |
| <b>b, Å</b>                                              | 30.9860(7)                                     |
| <b>c, Å</b>                                              | 4.6792(1)                                      |
| <b><math>\alpha</math>, °</b>                            | 90                                             |
| <b><math>\beta</math>, °</b>                             | 90                                             |
| <b><math>\gamma</math>, °</b>                            | 90                                             |
| <b>V, Å<sup>3</sup></b>                                  | 1641.53(7)                                     |
| <b>Z</b>                                                 | 2                                              |
| <b>Dx, g cm<sup>-3</sup></b>                             | 1.401                                          |
| <b><math>\mu</math>, mm<sup>-1</sup></b>                 | 0.973                                          |
| <b>F (000)</b>                                           | 740.0                                          |
| <b>GOF</b>                                               | 1.068                                          |
| <b>R1</b>                                                | 0.0522                                         |
| <b>wR2</b>                                               | 0.1484                                         |

**Table S2.** Performance parameters of ionogels for Na batteries.

| <b>Year</b> | <b>Electrolyte ingredients</b>                                                                           | <b>Ionic conductivity</b>               | <b>Self-healing</b> | <b>T<sub>Na+</sub></b> | <b>Ref.</b> |
|-------------|----------------------------------------------------------------------------------------------------------|-----------------------------------------|---------------------|------------------------|-------------|
| 2010        | [P(VDF-HFP) + 0.5 M EMITf/NaCF <sub>3</sub> SO <sub>3</sub> ]                                            | 5.74 × 10 <sup>-3</sup> S/cm at 27 °C   | —                   | 0.23                   | 1           |
| 2015        | [Silica fumed powder + 0.3 M NaNTf <sub>2</sub> /C <sub>4</sub> mpyrNTf <sub>2</sub> ]                   | 1.1 × 10 <sup>-3</sup> S/cm at rt       | —                   | —                      | 2           |
|             | [PMMA + 0.3 M NaNTf <sub>2</sub> /C <sub>4</sub> mpyrNTf <sub>2</sub> ]                                  | 7 × 10 <sup>-4</sup> S/cm at rt         | —                   | —                      |             |
| 2016        | [(PEO + 10 wt.% NaMS) + 60 wt.% BMIM-MS]                                                                 | 1.05 × 10 <sup>-4</sup> S/cm at 30 °C   | —                   | 0.46                   | 3           |
| 2016        | [NaTFSI(PEO) <sub>9</sub> + 20 wt.% Pyr <sub>13</sub> TFSI]                                              | 10 <sup>-4</sup> S/cm at 20 °C          | —                   |                        | 4           |
|             | [(P(VDF-HFP) + 0.5 M NaTf/EMITf) + 5 wt.% Al <sub>2</sub> O <sub>3</sub> ]                               | 6.3 – 6.8 × 10 <sup>-3</sup> S/cm at rt | —                   | 0.27                   |             |
| 2016        | [(P(VDF-HFP) + 0.5 M NaTf/EMITf) + 5 wt.% NaAlO <sub>2</sub> ]                                           | 5.5 – 6.5 × 10 <sup>-3</sup> S/cm at rt | —                   | 0.42                   | 5           |
| 2017        | [(PEO <sub>20</sub> /NaClO <sub>4</sub> ) + 5 wt.% SiO <sub>2</sub> + 70 wt.% Emim FSI]                  | 1.3 × 10 <sup>-3</sup> S/cm at rt       | —                   | 0.61                   | 6           |
| 2017        | [PEO/NaClO <sub>4</sub> + 30 wt.% 1-butyl-3-methylimidazolium thiocyanate]                               | 5 × 10 <sup>-4</sup> S/cm at rt         | —                   | —                      | 7           |
| 2017        | [P(VDF-HFP)/NaN(CF <sub>3</sub> SO <sub>2</sub> ) <sub>2</sub> ]/Mono cationic ionic liquids(70:30, w/w) | 2.2 × 10 <sup>-4</sup> S/cm at rt       | —                   | 0.1 – 0.5              | 8           |
| 2017        | [PVC + Na[FSA]/[C <sub>2</sub> C <sub>1</sub> im][FSA]]                                                  | 5.6 × 10 <sup>-3</sup> S/cm at 45 °C    | —                   | —                      | 9           |
| 2020        | [SBVI/MPC/TFEMA + 0.5M NaTFSI/BMP TFSI]                                                                  | 1.6 × 10 <sup>-3</sup> S/cm at rt       | —                   | 0.19                   | 10          |
| 2020        | [SBA-15/ P(VDF-HFP) + NaTFSI/PY <sub>13</sub> FSI]                                                       | 2.48 × 10 <sup>-3</sup> S/cm at 30 °C   | —                   | 0.37                   | 11          |

|      |                                                                                                               |                                  |     |        |           |
|------|---------------------------------------------------------------------------------------------------------------|----------------------------------|-----|--------|-----------|
| 2021 | [m-PDMS/MTMS/HCOOH + 0.5M NaFSI/ C <sub>4</sub> mpyrTFSI]                                                     | $1 \times 10^{-3}$ S/cm at rt    | —   | —      | 12        |
| 2021 | [P(VDF-HFP)/TiO <sub>2</sub> + 0.5 M NaCF <sub>3</sub> SO <sub>3</sub> /BMImCF <sub>3</sub> SO <sub>3</sub> ] | $4 \times 10^{-4}$ S/cm at rt    | —   | 0.27   | 13        |
| 2022 | [D-gluconic acetal-based gelator + 0.3 M NaTFSI /BMPTFSI]                                                     | $1.43 \times 10^{-3}$ S/cm at rt | Yes | 0.1835 | This work |

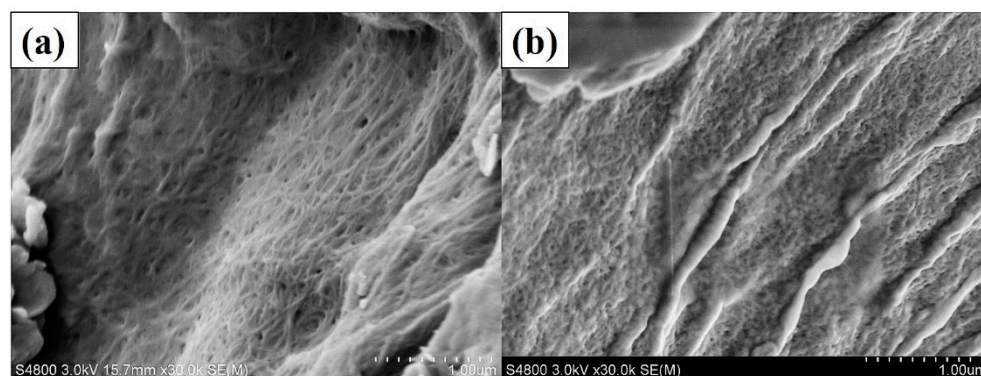

**Figure S3.** SEM images of the xerogels of (a) B8-BMPTFSI and (b) B8-BMPTFSI-NaTFSI ionogels.

The difference in morphology between SEM and POM images may be related to the preparation of xerogel; during solvent exchange and freeze-drying, the microscopic morphology of the gel is easily damaged, and the gelator originally dispersed in the solvent will also crystallize, resulting in the change of the original morphology.

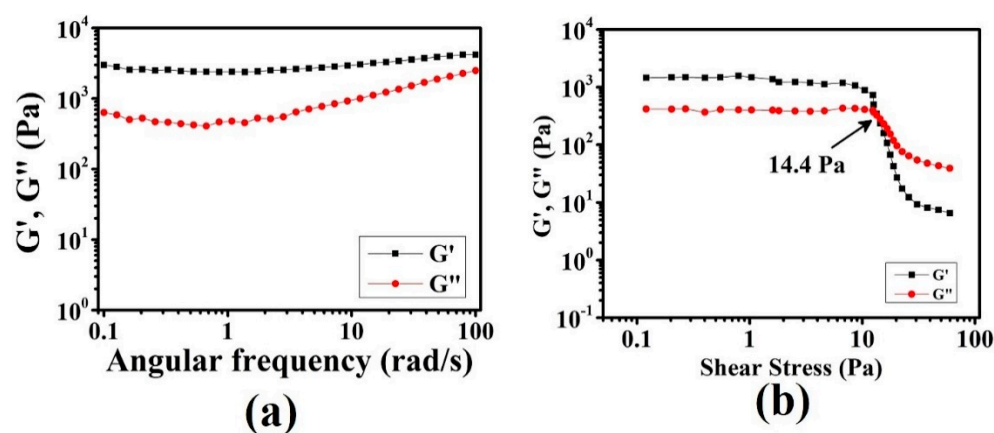

**Figure S4.** (a) Dynamic frequency sweep measurements and (b) Dynamic stress sweep measurements for B8-BMPTFSI-NaTFSI gel (4% B8, w/v; 0.3M NaTFSI).

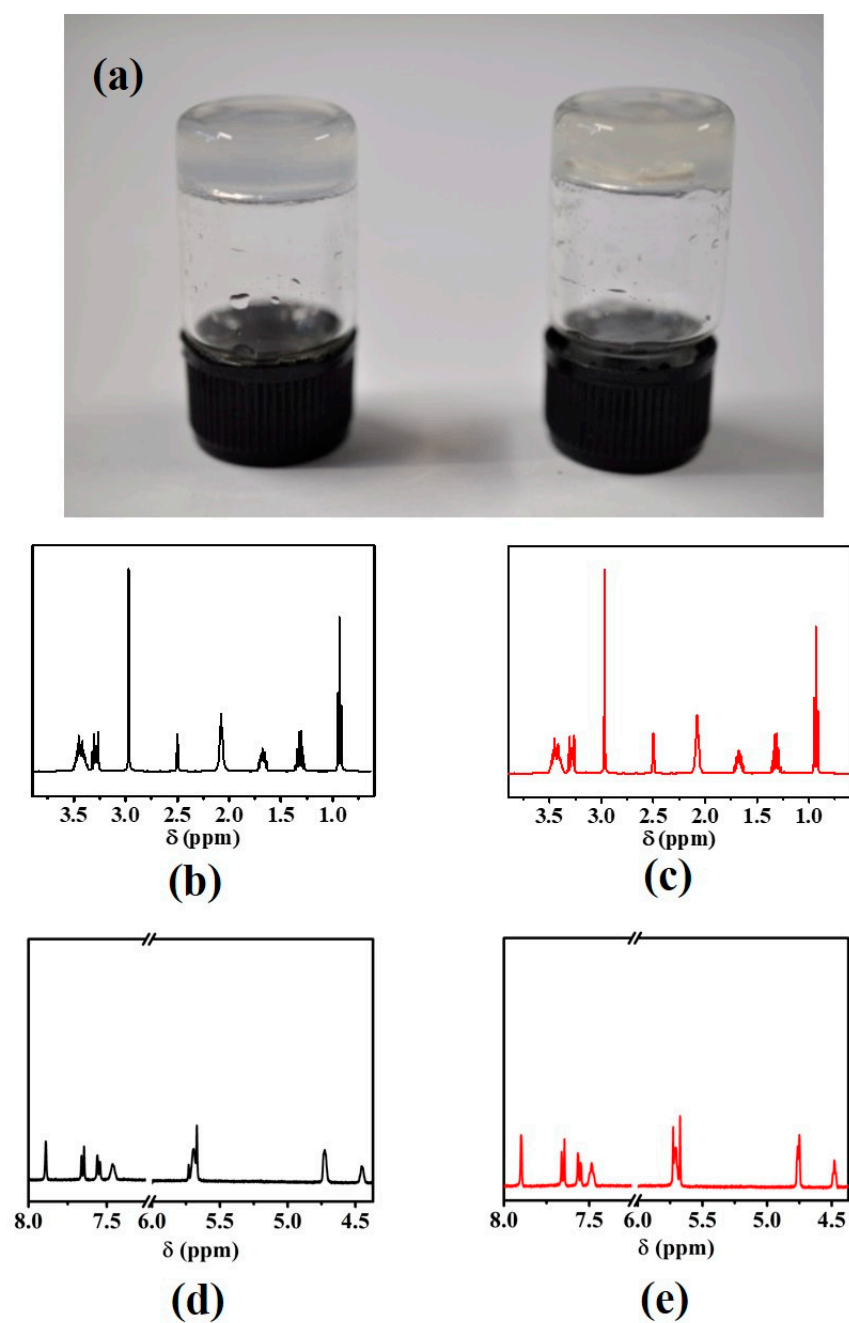

**Figure S5.** (a) B8-BMPTFSI-NaTFSI ionogel (4% B8, w/v, 0.3 M NaTFSI) (left), B8-BMPTFSI-NaTFSI ionogel (4% B8, w/v, 0.3 M NaTFSI) kept in inert environment at 50 °C for 30 days with Na (right); (b)  $^1\text{H}$ -NMR data of BMPTFSI of newly prepared ionogel; (c)  $^1\text{H}$ -NMR data of BMPTFSI of ionogel kept in inert environment at 50 °C for 30 days with Na; (d)  $^1\text{H}$ -NMR data of active groups of B8 in newly prepared ionogel; (e)  $^1\text{H}$ -NMR data of active groups of B8 in ionogel kept in inert environment at 50 °C for 30 days with Na.

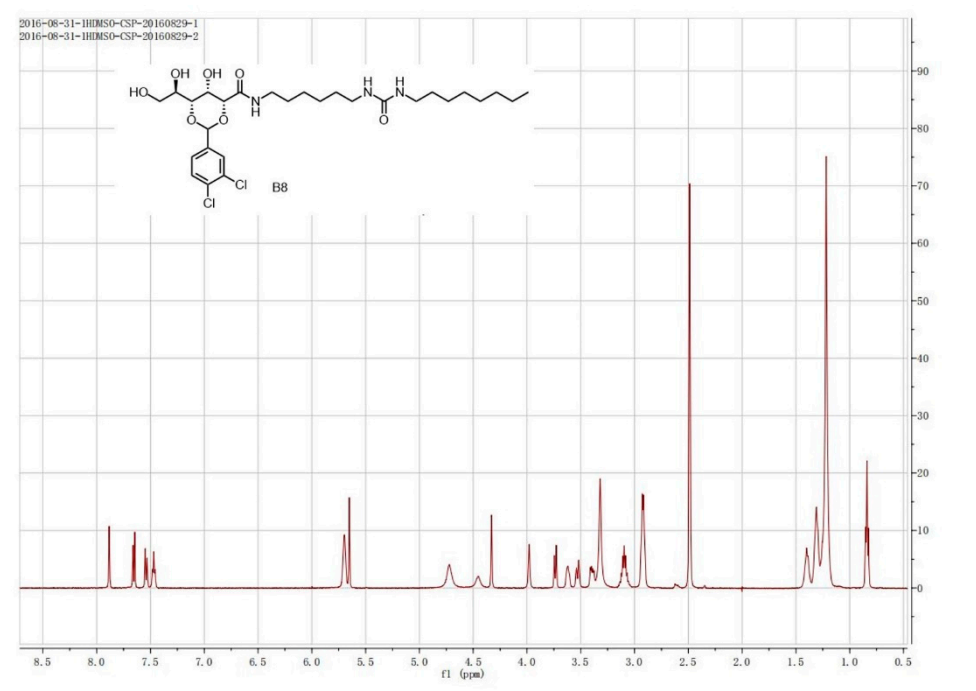

**Figure S6.** <sup>1</sup>H NMR (400MHz) Spectra of B8 in DMSO-d<sub>6</sub>.

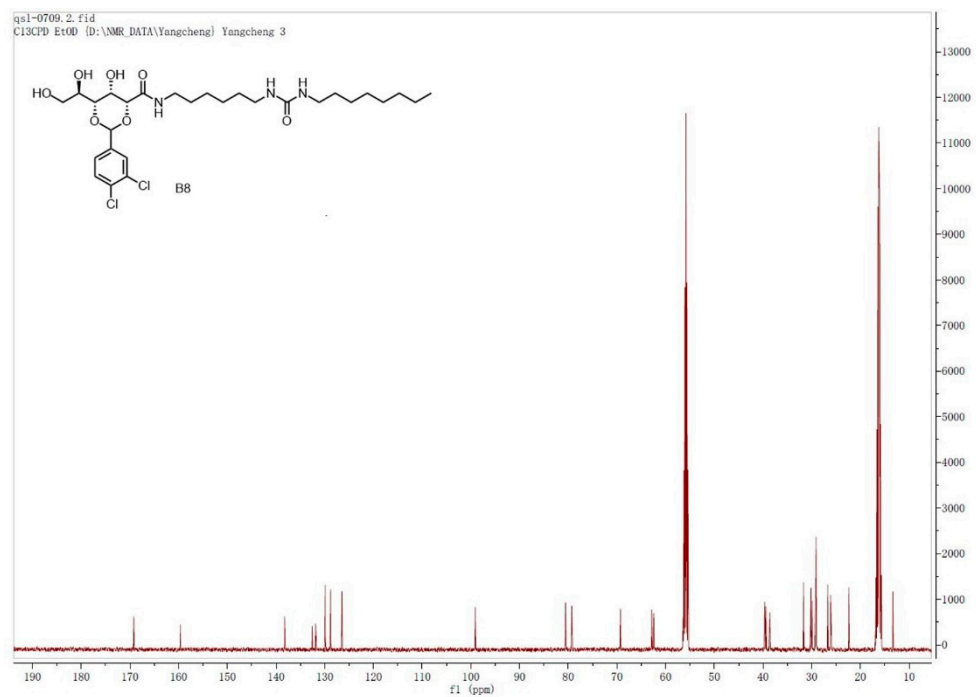

**Figure S7.** <sup>13</sup>C NMR (100MHz) Spectra of B8 in C<sub>2</sub>D<sub>6</sub>O.

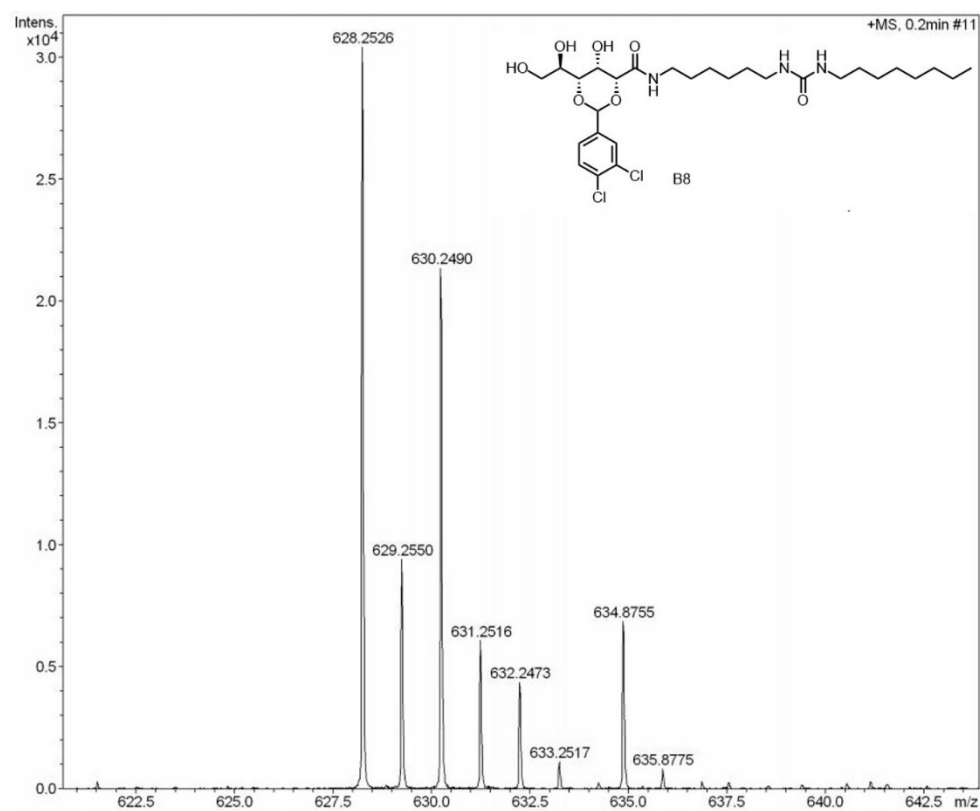

Figure S8. HRMS Spectra of B8 in DMF.

**Supporting CIF S1, 2:** Single-crystal XRD data of Z1 and the self-assembly mode of B8.
